# Supplementary material for: The value of 11-oxygenated androgens in the diagnosis and treatment of 21-hydroxylase deficiency
Source: Research Square preprint supplement (doi:10.21203/rs.3.rs-6484008/v1), 2025-05-09
Supplement: Supplementary file 1 [file be43609fc143a2878d3e7198.xlsx]

## Sheet: Sheet1
送检日期	病人姓名	性别	年龄	年龄	临床诊断	孕烯醇酮(ng/ml)	孕酮（黄体酮）(ng/ml)	11-脱氧皮质酮(ng/ml)	皮质酮(ng/ml)	醛固酮(ng/ml)	17α-羟孕烯醇酮(ng/ml)	17α-羟孕酮(ng/ml)	11-脱氧皮质醇(ng/ml)	21-脱氧皮质醇(ng/ml)	皮质醇(ng/ml)	可的松(ng/ml)	脱氢表雄酮(ng/ml)	雄烯二酮(ng/ml)	睾酮(ng/ml)	双氢睾酮(ng/ml)	雄酮(ng/ml)	雌酮(ng/ml)	11α-羟孕酮(ng/ml)	雌二醇	雌三醇	11 羟-雄烯二酮	11-酮睾酮	11-酮双氢睾酮	SW=1/SV=2	基因父1	基因母2	是否有效	骨龄	骨龄/年龄增长	身高	1年身高增长	体重	体表面积	氢化可的松	地塞米松	每平米氢可	氟氢可的松	芙瑞开始时间	芙瑞	GnRHa开始时间	GnRHa	GH开始时间	GH	Na
2021-06-08 19:50:48	韩锦程	男	30天	0.08	先天性肾上腺皮质增生症	61.822	5.846	0.184	9.664	0.479	6.845	231.631	1.71	25.816	414.928	45.35	4.081	13.157	1.722	0.618	9.481	0.02	5.938	0.007	0.005	11.101	3.015	0.421	1	c.-308G>C	C.923dupT C.955C>T				49	19.4	2.56	0.19	6			0.1							125.3
2022-02-21 20:13:59	向晓倩	女	1月7天	0.08	先天性肾上腺皮质增生症	0.848	<0.05	0.59	1.797	0.157	0.065	0.228	2.448	<0.0125	13.434	1.224	0.642	0.238	<0.05	0.08	0.207	<0.005	0.097	<0.005	<0.005	0.58	0.082	<0.05	2
2021-06-28 19:33:05	韩锦程	男	1月20天	0.17	先天性肾上腺皮质增生症	12.228	13.55	0.091	2.266	0.022	14.535	197.529	0.474	43.185	5.284	1.878	3.767	2.2	0.809	0.346	0.246	0.009	0.603	0.005	0.005	0.817	1.681	0.079	1	c.-308G>C	C.923dupT C.955C>T				52	19.4	3	0.205	3.25			0.06							138.6
2022-01-07 19:54:56	宋家豪	男	1月25天	0.17	中枢性性早熟	0.849	0.056	<0.05	4.059	0.161	0.069	0.466	1.191	0.016	62.106	28.897	4.102	0.244	1.194	0.189	0.207	<0.005	<0.05	<0.005	<0.005	2.151	0.095	<0.05
2021-08-03 19:44:51	韩锦程	男	2月25天	0.25	先天性肾上腺皮质增生症	0.279	0.044	0.03	0.029	0.495	0.542	1.077	0.02	0.125	97.423	26.857	0.087	0.075	0.783	0.307	0.203	0.091	1.918	0.022	0.007	3.235	0.055	0.051	1	c.-308G>C	C.923dupT C.955C>T				56.4	19.4	4.5	0.26	3.25			0.05							139.2
2021-06-30 16:03:04	袁伟哲	男	4月25天	0.33	先天性肾上腺皮质增生症	2.486	18.699	0.014	2.538	0.543	16.959	175.876	0.484	53.713	7.929	2.684	1.412	1.319	0.201	0.162	0.249	0.02	0.691	0.005	0.005	0.946	0.707	0.055		c.518T>A	c.293-13A/C>G		太小，无骨龄		75	9	10	0.45	5			0.05							136.3
2021-04-24 19:11:08	李明宵	男	5月10天	0.42	先天性肾上腺皮质增生症	6.159	1.445	0.02	0.518	0.016	1.246	108.981	0.071	6.514	3.297	0.783	0.152	0.887	0.115	0.41	0.478	0.072	5.152	0.016	0.005	1.2	0.785	0.064	1	exon1-7Del	PR484p				62.5	23	6.5	0.33	3.5			0.1							139.1
2021-05-26 19:56:44	海豚	男	6月24天	0.5	先天性肾上腺皮质增生症	11.038	1.643	0.037	0.652	0.028	2.253	122.006	0.109	8.769	4.701	1.04	0.268	0.359	0.122	0.148	0.326	0.005	2.145	0.005	0.005	0.321	0.345	0.053	1	c.293.13C>G	exon1-6重复				76.5	12.8	12.5	0.5735	7.5			0.1							137.7
2021-11-08 17:09:57	韩锦程	男	6月	0.5	先天性肾上腺皮质增生症	0.575	0.7	<0.05	0.036	0.201	0.846	16.643	0.085	7.648	6.591	10.656	<0.05	0.222	<0.05	<0.05	0.22	<0.005	0.567	<0.005	<0.005	0.245	0.073	<0.05	1	c.-308G>C	C.923dupT C.955C>T				65.6	19.4	6.5		3			0.05
2021-04-13 18:42:33	董方宇	男	10月16天	0.83	先天性肾上腺皮质增生症	96.44	31.788	0.184	7.015	0.18	27.339	365.794	1.915	54.336	46.785	9.829	0.521	15.598	2.446	0.528	5.484	0.021	8.509	0.005	0.005	1.831	1.953	0.131	1	c.293-13C>G	c.293-13C>G				70		9	0.415	10			0.05							123.4
2021-11-29 19:57:41	袁伟哲	男	10月25天	0.83	先天性肾上腺皮质增生症	0.929	2.088	<0.05	0.311	0.104	1.126	38.859	0.191	9.913	82.491	39.198	<0.05	0.55	0.053	0.058	0.334	0.007	5.75	<0.005	<0.005	2.349	1.217	<0.05					太小，无骨龄
2021-08-04 19:42:01	杨悦希	女	1岁1月0天	1.08	先天性肾上腺皮质增生症	0.23	0.158	0.056	0.321	0.292	0.243	7.322	0.02	2.998	4.587	2.312	0.113	0.052	0.023	0.05	0.21	0.012	0.095	0.006	0.005	0.939	0.226	0.148	1	c.293-13C/A>G				1	84.3	14	13	0.555	6			0.06							136.8
2021/3/2	廖芊羽	女	1岁3月0天	1.25	先天性肾上腺皮质增生症	4.534	0.601	0.029	0.735	0.352	0.854	36.557	0.189	26.098	73.623	13.155	0.88	0.196	0.284	0.053	0.247	0.005	3.157	<0.005	<0.005				1	p.Q319*,p.R357W	c.308G>C		3	0.7	80	8	10	0.45	6	0		0	0	0	0	0	0	0	141
2021-06-28 19:18:00	张小希	女	1岁4月0天	1.33	先天性肾上腺皮质增生症	0.759	0.752	0.034	0.149	0.018	1.077	20.818	0.042	2.864	4.627	0.865	0.128	0.045	0.049	0.05	0.211	0.005	0.106	0.005	0.005	0.037	0.058	0.109	1	c.92C>T	c.923-924insT C.955C>T				84.4	8.4	12.5	0.5375	7.5			0.05							137.4
2021/3/24	张小希	女	1岁4月0天	1.33	先天性肾上腺皮质增生症	0.799	0.619	0.03	1.047	0.309	0.689	13.815	0.251	13.153	174.294	40.658	0.669	0.116	0.108	0.055	0.45	0.321	0.125	0.145	0.044				2	p.P31L	L308Fs*6;Q319*				79.5	9	11.5	0.5025	6.25			0.05	0	0	0	0	0	0	139
2021-05-19 17:15:01	廖芊羽	女	1岁5月0天	1.42	先天性肾上腺素皮质增生症	0.194	0.112	0.028	0.04	0.211	0.363	3.593	0.033	0.881	151.4	18.898	0.332	0.067	0.043	0.05	0.218	0.025	2.273	0.014	0.005	1.341	0.31	0.05	1	p.Q319*,p.R357W	c.308G>C		3	0.7	80	8	10	0.45	6										1139.9
2022-01-25 19:55:52	郑嘉欣	女	1岁5月0天	1.42	先天性肾上腺皮质增生症	1.346	0.767	0.025	0.392	0.301	0.723	8.36	0.476	2.349	19.472	13.715	<0.05	0.173	<0.05	<0.05	0.204	<0.005	0.35	<0.005	<0.005	0.842	0.482	<0.05
2021-04-23 20:31:53	陈羽川	男	1岁6月0天	1.5	先天性肾上腺皮质增生症	0.535	0.143	0.015	1.012	0.139	0.369	0.561	0.009	0.125	69.022	16.304	0.153	0.021	0.012	0.05	0.241	0.005	3.92	0.005	0.005	0.375	0.586	0.084	1	PQ3119X	Hex			0.71	79.6	7.28	10.5	0.47	6			0.1							141.5
2021-11-22 19:46:28	杨悦希	女	1岁8月0天	1.67	先天性肾上腺皮质增生症	0.518	0.318	<0.04	<0.05	0.307	0.525	5.422	<0.05	0.761	0.065	0.864	<0.05	0.085	<0.05	<0.05	0.203	<0.005	0.013	<0.005	<0.005	0.196	0.628	<0.05	1				2.5	1	86	9.84	13.5	0.5725	6.5			0.06
2021-04-23 20:31:30	肖浩宇	男	1岁10月0天	1.83	先天性肾上腺皮质增生症	0.673	0.532	0.035	0.921	0.011	0.89	55.994	0.147	6.928	3.125	0.605	0.593	0.234	0.071	0.05	0.394	0.005	3.431	0.005	0.005	1.432	1.645	0.064	1	c.293.13C>G	P.R357W(C.1069>T)(Het)		2	0.8	84.3	7.5	11.5	0.5	7			0.0125							141.7
2021-09-09 20:26:50	陈羽川	男	1岁11月0天	1.9	先天性肾上腺皮质增生症	0.181	0.077	0.045	0.021	0.029	0.128	0.419	0.013	<0.125	31.669	21.213	0.042	0.031	0.026	0.022	0.201	<0.005	0.534	<0.005	<0.005	2.467	0.348	<0.05	1	PQ3119X	Hex			0.71		7.28			6			0.1
2021-08-02 19:16:05	李羿鸣	男	2岁	2	先天性肾上腺皮质增生症	0.069	1.201	0.076	0.333	0.15	1.037	12.917	0.085	5.911	2.629	0.856	0.07	0.026	0.02	0.05	0.125	0.005	0.265	0.005	0.005	0.066	0.05	0.05	2	P.I173N	P.R484Pfs*58		未测		83.1	10.5	9.5	0.4325											136.6
2021-12-20 19:19:14	杨茜然	女	2岁1月0天	2.08	先天性肾上腺皮质增生症	0.106	<0.05	0.07	1.014	0.346	0.459	0.127	0.397	0.009	40.567	38.25	0.118	0.067	<0.05	<0.05	0.319	<0.005	0.059	<0.005	<0.005	1.925	0.262	0.094
2022-02-21 20:18:24	张小希	女	2岁3月0天	2.25	先天性肾上腺皮质增生症	<0.05	<0.05	<0.04	<0.05	0.091	0.062	1.008	<0.05	0.144	6.407	1.815	<0.05	<0.05	<0.05	<0.05	0.204	<0.005	0.057	<0.005	<0.005	0.354	0.195	<0.05	2	p.P31L	L308Fs*6;Q319*		2	1	92	12.5	14.5		7	0		0.05	0	0	0	0	0	0	137.4
2021-12-17 19:37:10	肖浩宇	男	2岁6月0天	2.5	先天性肾上腺皮质增生症	10.156	2.381	<0.04	0.669	0.223	3.105	121.33	0.313	21.837	5.358	2.37	0.421	0.589	0.103	<0.05	0.418	0.009	0.623	<0.004	<0.005	1.4	0.826	<0.05	1	c.293.13C>G	P.R357W(C.1069>T)(Het)			0.8	89.3	7.5	13		7			0.025
2021-05-26 19:57:04	刘之瑶	女	3岁6月0天	3.5	先天性肾上腺素皮质增生症	0.614	0.296	0.099	0.058	0.019	0.414	0.126	0.061	0.125	1.35	0.104	0.201	0.152	0.002	0.05	0.405	0.005	0.173	0.006	0.005	0.5	0.307	0.051	1	c.293.13C>G	Hom		3.5	1	103.3	6	17	0.695	8			0.05							137
2021-09-03 20:09:42	刘之瑶	女	3岁9月0天	3.75	先天性肾上腺皮质增生症	0.085	0.046	0.021	0.117	0.113	0.052	0.424	0.005	<0.125	0.397	0.667	0.062	0.005	0.014	0.031	0.002	<0.005	0.019	<0.005	<0.005	0.122	0.026	<0.05	1	c.293.13C>G	Hom			1	104.8	6	17	0.695	8			0.05							137
2021/3/2	廖孜矞	女	3岁11月0天	3.92	先天性肾上腺皮质增生症	9.931	3.296	0.048	2.172	0.176	2.998	132.913	0.472	53.949	46.742	7.908	2.274	0.944	0.179	0.103	0.45	0.007	8.027	<0.005	<0.005				1	C.923dupT C.955C>T C.1069C>T	C.-308G>C		5.75		108.7	3.96	20	0.8	10	0		0	0	0	0	0	0	0	138.6
2021-05-17 21:34:08	廖孜矞	女	4岁1月0天	4.08	先天性肾上腺皮质增生	1.218	0.357	0.065	0.069	0.281	0.87	12.092	0.079	2.026	181.207	22.397	0.429	0.107	0.045	0.05	0.409	0.005	4.218	0.005	0.005	5.01	2.151	0.073	1	C.923dupT C.955C>T C.1069C>T	C.-308G>C		5.75		109.6	3.6	19	0.77	10
2021-12-27 19:04:14	刘之瑶	女	4岁1月0天	4.08	先天性肾上腺皮质增生症	0.107	<0.05	<0.04	<0.05	0.143	<0.05	0.836	<0.05	0.079	<0.05	0.745	<0.05	0.053	<0.05	0.094	0.206	<0.005	0.105	<0.005	<0.005	0.515	0.147	<0.05		c.293.13C>G	Hom			1	106.3	6	17	0.695	8			0.033							139.8
2021-06-04 20:12:05	张嘉峻	男	4岁2月0天	4.17	先天性肾上腺皮质增生症	0.502	0.078	0.025	0.106	0.018	0.651	0.792	0.045	0.125	1.847	0.601	0.266	0.024	0.017	0.05	0.34	0.006	0.117	0.005	0.005	0.132	0.05	0.05	1	PQ319X	C.995C>T		4.5	1	103	6.7	19	0.765	9			0.025							138.2
2021-10-08 19:03:42	张嘉峻	男	4岁2月0天	4.17	先天性肾上腺皮质增生症	0.093	<0.05	<0.02	<0.05	0.167	<0.05	0.791	<0.05	0.328	5.077	2.857	<0.05	0.043	<0.05	<0.05	0.128	<0.005	0.055	<0.004	<0.005	0.835	0.069	<0.05	1	PQ319X	C.995C>T		4.5	0	107.6	6.2	20		9			0.025
2021/3/31	魏宇辰	男	4岁3月0天	4.25	先天性肾上腺皮质增生症	0.272	0.932	0.039	0.4	0.016	0.491	44.948	0.125	5.398	2.28	0.879	0.137	0.539	0.081	0.066	0.419	<0.005	0.274	<0.005	<0.005	0.565	0.388	0.099	1	Exon3Del	I2G		5	1.5	102.6	5.1	16	0.66	7.5	0		0.025	0	0	0	0	0	0	137
2021-05-14 16:19:50	陈宇轩	男	4岁6月0天	4.5	先天性肾上腺皮质增生症	2.505	0.931	0.031	0.124	0.02	0.876	57.947	0.034	2.856	2.206	0.587	0.109	0.591	0.144	0.091	0.212	0.012	0.26	0.005	0.005	0.911	0.717	0.05	1					1.56		9.5			13.75
2021-08-02 19:15:28	胡泽然	男	4岁6月0天	4.5	先天性肾上腺皮质增生症	0.083	0.241	0.086	0.034	0.173	0.137	9.719	0.066	2.628	4.56	1.828	0.05	0.07	0.022	0.05	0.207	0.005	0.035	0.005	0.005	0.05	0.05	0.05	1	c.293.13C>G	Hom			1	108.3	7.9	17.5	0.7125	8			0.025							138.3
2021-11-20	刘楚凌	男	4岁6月0天	4.5	先天性肾上腺皮质增生	0.177	1.18	<0.04	0.369	0.142	0.562	34.607	0.05	2.584	1.282	1.445	<0.05	1.765	<0.05	<0.05	0.246	0.009	0.127	<0.005	<0.005	2.408	1.616	<0.05	1	c.1069C＞T p.R357w(Het)	C.293-13C＞G IN2（Het）		5	2	115	9.1	19	0.765	9			0.05							142.7
2021-04-09 18:33:44	林雨晨	女	4岁8月0天	4.67	先天性肾上腺皮质增生症	10.491	5.723	0.191	1.25	0.075	0.926	171.102	0.922	17.16	21.11	6.797	6.834	22.397	1.47	0.319	2.277	0.031	5.223	0.006	0.005	1.424	1.961	0.101	2	c.518T>A	c.293-13A/C>G		11		127.7	10	25	0.975	15	0.175				1.875					141.1
2021-08-04 19:52:07	王志豪	男	4岁8月0天	4.67	先天性肾上腺皮质增生症	0.257	0.816	0.085	0.54	0.313	0.616	52.558	0.123	5.591	7.97	3.457	0.24	0.891	0.124	0.066	0.319	0.005	3.376	0.005	0.005	1.366	1.688	0.113	1	ex3del	Het,I2Ghom		指骨4.5，腕骨3	1.4	109	9.2	19.5	0.78	9			0.025							138.5
2022-01-24 20:58:10	廖孜矞	女	4岁9月0天	4.75	先天性肾上腺皮质增生症	0.84	1.261	<0.04	0.552	0.289	1.1	38.129	0.2	22.266	15.889	4.702	0.528	0.409	<0.05	<0.05	0.233	<0.005	0.134	<0.005	<0.005	0.982	1.267	<0.05	1	C.923dupT C.955C>T C.1069C>T	C.-308G>C				112	3.96	21	0.835	10			0.01875
2021-09-17 20:20:27	袁晨轩	男	4岁10月0天	4.83	先天性肾上腺皮质增生症	4.313	4.891	<0.02	1.764	0.099	4.508	126.47	0.146	20.032	9.152	2.623	5.516	6.953	1.046	0.248	0.586	0.009	0.406	<0.005	<0.005	2.12	4.106	0.197					13
2022-01-10 20:52:41	袁晨轩	男	5岁1月0天	5.08	先天性肾上腺皮质增生症	2.375	2.563	<0.04	0.237	0.09	2.232	37.974	0.166	6.485	3.891	2.264	1.873	2.036	0.283	0.063	0.288	<0.005	0.621	<0.004	<0.005	0.788	1.657	<0.05					13.5	1.3
2022-01-07 19:59:20	陈宇轩	男	5岁2月0天	5.17	先天性肾上腺皮质增生症	0.658	0.308	<0.04	<0.05	0.099	0.205	15.053	<0.05	1.5	0.791	0.851	<0.05	0.388	<0.05	<0.05	0.203	<0.005	0.075	<0.004	<0.005	0.416	0.854	<0.05						1.56		9.5			13.75
2022-01-24 20:50:34	胡泽然	男	5岁4月0天	5.33	先天性肾上腺皮质增生症	0.117	0.291	<0.04	0.118	0.11	0.224	14.871	0.063	1.255	2.984	2.646	<0.05	0.268	<0.05	<0.05	0.205	0.008	0.139	<0.005	<0.005	0.211	0.91	<0.05	1	c.293.13C>G	Hom		5	1	112	7.4	18	0.73	10			0.025
2021-09-27 14:46:51	舒子浩	男	5岁4月0天	5.33	先天性肾上腺皮质增生症	0.15	0.154	0.003	0.053	0.328	0.182	14.884	0.014	1.135	1.3	3.173	<0.02	0.592	0.023	<0.05	0.2	<0.005	0.282	<0.005	0.007	0.267	0.356	<0.05	1				7	1	111.4	5.3	19	0.765	10			0.025
2021/3/18	裴福壘	男	5岁6月0天	5.5	先天性肾上腺皮质增生症	0.419	0.048	0.047	0.227	0.458	0.211	1.126	0.085	0.322	165.821	40.567	0.102	0.018	0.025	<0.05	0.204	<0.005	2.852	<0.005	<0.005	2.888	0.604	0.076	1	I2G	I2G			1	107.6	6.7	18	0.73	7	0		0.33	0	0	0	0	0	0	140.1
2021/3/31	杨伶萱	女	5岁7月0天	5.58	先天性肾上腺皮质增生症	1.259	0.422	0.047	0.313	0.283	0.693	14.945	0.106	3.317	146.882	32.161	3.027	3.133	0.362	0.075	0.825	0.008	1.548	0.005	0.011	4.003	1.886	0.099	2	c.R484Pfs	c.P31L		8.83	1.17	127.4	7.7	26		13	0		0	0	0	0	0	0	0	138.1
2021-07-19 19:14:40	杨伶萱	女	5岁9月0天	5.75	先天性肾上腺皮质增生症	0.325	0.329	0.111	0.151	0.098	0.579	16.204	0.121	3.314	111.626	25.68	2.054	1.475	0.252	0.052	0.387	0.005	2.308	0.005	0.016	3.972	2.777	0.076	2	c.R484Pfs	c.P31L		9	1.17	131.9	7.7	29.5	1.13	13				2022.2	1.25			2022.5		141.2
2022-01-28 21:08:00	舒子浩	男	5岁11月0天	5.92	先天性肾上腺皮质增生症	0.699	1.196	<0.04	<0.05	0.112	1.155	24.518	<0.05	6.625	168.223	27.127	<0.05	0.635	<0.05	<0.05	0.2	0.009	0.334	<0.005	<0.005	4.456	0.971	<0.05	1					1	114.4	7.6	21	0.835	10			0.016
2021/3/31	唐诚果	女	5岁11月0天	5.92	先天性肾上腺皮质增生症	12.23	28.356	0.1	2.965	0.061	24.217	92.784	0.586	19.628	20.776	6.387	1.334	1.422	0.167	0.201	0.373	0.006	0.658	0.011	<0.005	0.955	0.744	0.051	2	R484Pfs*58	S494N		8.9		117.5	8	21	0.835	10	0		0	0	0	0	0	0	0	139.4
2021-08-05 16:43:06	唐诚果	女	6岁1月0天	6.08	先天性肾上腺皮质增生症	7.758	7.216	0.109	2.75	0.235	5.418	81.643	0.336	40.813	23.73	7.604	1.352	1.388	0.258	0.052	0.276	0.024	6.504	0.009	0.006	2.996	1.634	0.05	2	p.k327del	Het				117.5	7.5	21	0.835	10										142.9
2021-11-29 19:54:47	王晖	男	6岁1月0天	6.08	先天性肾上腺皮质增生症	0.032	0.287	0.061	0.968	0.376	0.27	18.614	0.067	6.038	7.055	8.548	0.061	1.201	<0.05	0.085	0.23	0.008	0.332	<0.004	<0.005	1.63	2.321	<0.05	1	I2G(Het)，	p.Ser126(Het)		7	1	118.5	10.2	21	0.835	11			0.025
2022-01-07 20:01:20	裴福壘	男	6岁4月0天	6.33	先天性肾上腺皮质增生症	0.115	<0.05	<0.05	<0.05	0.1	0.254	0.1	<0.05	0.041	10.114	6.812	<0.05	<0.05	<0.05	<0.05	<0.05	<0.005	0.006	<0.004	<0.005	0.229	0.063	<0.05	1	I2G	I2G		4.5	1	112.6	6.7	19.5	0.7825	7			0.33							142.9
2021-05-08 20:23:03	周宇浩	男	6岁8月0天	6.67	先天性肾上腺皮质增生症	0.187	0.139	4.567	7.462	0.053	0.82	3.221	44.96	0.126	15.484	4.083	1.239	2.325	0.305	0.092	0.477	0.005	0.401	0.005	0.005	0.325	0.086	0.05	2	c.395+G>A	11βEX1-6Del		11.5		129.8	5.9	28	1.08	13.75								2017.11.15	5	142.1
2021-07-09 19:23:32	李悦彤	女	7岁1月0天	7.08	先天性肾上腺皮质增生症	0.659	0.572	0.023	0.041	0.637	0.483	8.377	0.022	3.319	0.517	0.333	0.278	0.704	0.153	0.05	0.226	0.013	0.022	0.005	0.024	0.716	0.55	0.059	2	I2G	c.518T>A		12	0.88	138.2	6.4	38.5	1.22	13.75	0.09						3.75		6	139
2021-11-12 17:20:35	周宇浩	男	7岁3月0天	7.25	先天性肾上腺皮质增生症（11β-羟化酶缺乏症）	0.564	0.164	7.218	7.021	0.222	0.535	1.59	56.885	<0.0125	6.019	5.627	0.592	2.774	0.146	<0.05	0.32	<0.005	0.105	<0.005	<0.005	0.755	0.341	<0.05
2021-07-13 20:12:33	傅姿铭	女	7岁4月0天	7.33	先天性肾上腺皮质增生症	13.281	3.88	0.1	0.77	0.076	5.666	114.228	0.145	14.359	9.383	4.137	5.89	3.376	0.497	0.05	0.252	0.018	0.856	0.005	0.005	0.577	2.934	0.101	2	c.518T>A	P.I173N		12	2	142	5.7	41	1.27	15	0.1875				2		3.75	2019.1	6.5	143.1
2022-01-24 20:47:42	谭思源	男	7岁4月0天	7.33	先天性肾上腺皮质增生症	0.568	0.206	<0.05	0.124	0.173	0.292	12.321	<0.05	1.023	0.418	0.587	0.087	0.139	<0.05	<0.05	0.38	0.008	0.144	<0.005	<0.005	0.472	0.928	<0.05	1				9		133.7		31.5		12.5			0.0125							139.3
2021-08-10 20:06:29	石琬嫣	女	7岁9月0天	7.75	先天性肾上腺皮质增生症	0.329	0.172	0.029	0.109	0.285	0.273	4.739	0.012	1	4.588	3.469	0.02	0.061	0.491	0.05	0.218	0.053	0.269	0.007	0.005	0.409	0.12	0.05	1	P.R324W	R484pfsx58		7.83						10										140
2021-09-24 19:47:50	邱梦琪	女	8岁4月0天	8.33	先天性肾上腺皮质增生症	0.318	0.006	0.016	0.367	0.181	0.106	10.412	0.241	0.662	140.575	71.887	0.188	1.613	0.258	0.005	0.227	0.006	1.059	0.005	0.005	3.129	1.387	0.05	2	c.518T＞A	c.293-13A＞G		13.5	1.5	151.5	7	38	1.21	17.5
2021-05-18 19:06:59	李俊锋	男	8岁5月0天	8.42	先天性肾上腺皮质增生症	2.363	0.74	0.023	0.335	0.101	0.572	51.424	0.053	5.32	108.921	10.029	0.945	1.382	0.687	0.068	0.417	0.005	3.268	0.005	0.005	4.132	2.888	0.065	1	I2G	Arg354His			1.2	145.2	12	40	1.25	12.5										140.8
2021-08-18 19:33:43	李俊锋	男	8岁6月0天	8.5	先天性肾上腺皮质增生症	0.155	0.5	0.073	0.016	0.254	0.892	12.452	0.013	3.007	100.01	16.307	0.118	0.561	0.094	0.052	0.238	0.006	0.608	0.005	0.005	4.574	1.059	0.05	1	I2G	Arg354His			1.2	149	11.76	40	1.25	12.5	1.875		0.03							140.8
2021-11-22 19:53:48	李俊锋	男	8岁11月0天	8.92	先天性肾上腺皮质增生症	0.224	0.191	<0.05	0.108	0.135	0.301	9.033	<0.05	0.904	71.763	24.694	0.166	0.546	0.069	0.056	0.216	<0.005	0.592	<0.005	<0.005	4.478	0.589	<0.05	1	I2G	Arg354His		12.5	1.2	150	3.2	48	1.61	17.5	1.875		0.03
2022-01-25 19:55:06	邱梦琪	女	9岁	9	先天性肾上腺皮质增生症	0.445	0.105	<0.02	<0.05	0.206	0.277	4.295	<0.05	2.369	55.964	48.401	0.145	0.714	<0.05	0.086	0.203	0.007	0.337	<0.005	<0.005	2.106	1.036	<0.05	2	c.518T＞A	c.293-13A＞G			1.3	152.9	5.6	38.2	1.214	15	0.187		0.0166
2021-10-08 19:03:08	司马婧琪	女	9岁	9	先天性肾上腺皮质增生症	1	2.42	0.096	0.866	0.283	1.015	42.703	0.345	11.387	10.274	5.429	<0.05	0.481	0.269	<0.05	0.217	<0.005	0.748	<0.005	<0.005	0.601	1.233	<0.05	2	p.I173N	Exon1-10del		8.5		130	6	27.5		13			0.0167
2021-07-19 19:07:03	杨焱	男	9岁	9	先天性肾上腺皮质增生	1.002	7.1	0.031	1.527	0.012	4.844	99.135	0.101	9.781	1.483	0.409	0.815	4.515	1.047	0.128	0.288	0.009	0.825	0.005	0.005	0.89	1.805	0.092	1				13	2	143.2	11	33.4	1.12	10	0.2813		0.025							142.7
2021-12-22 19:42:27	杨焱	男	9岁5月0天	9.42	先天性肾上腺皮质增生症	2.35	0.539	0.078	0.624	0.123	0.521	13.275	0.124	2.744	34.746	24.762	0.119	2.022	0.336	0.052	0.656	<0.005	1.017	<0.004	<0.005	1.953	1.41	<0.05	1				14	2	144.1	6	35		10			0.025
2021/4/14	杜晓磊	男	9岁10月0天	9.67	先天性肾上腺皮质增生症	0.584	0.221	0.016	0.125	0.005	0.685	8.679	0.071	1.294	0.537	0.181	0.198	0.067	0.011	0.078	0.276	0.008	0.849	0.005	<0.005	1.211	0.088	<0.05	2	p.R357W	Exon3Del		13	0.5	143.9	3.4	35	1.15	10	0.188		0.025	2020.6	2	2020.6	3.75	0	0	140.2
2021-11-16 14:36:53	谭瑞寒	女	9岁9月0天	9.75	先天性肾上腺皮质增生症(17α-羟化酶缺乏症)	7.839	0.593	1.056	115.696	0.245	1.076	0.134	22.738	0.076	0.81	0.139	<0.05	0.028	<0.05	0.053	0.259	<0.005	0.101	<0.005	<0.005	0.581	0.239	<0.05
2021-07-28 16:59:33	孙雅莉	女	9岁10月0天	9.83	先天性肾上腺皮质增生症	2.097	3.033	0.001	0.158	0.141	2.167	75.488	0.072	4.596	9.132	3.648	0.649	3.108	0.597	0.204	0.291	0.028	1.711	0.046	0.005	3.659	3.325	0.216	2	P.I173N	EX3DEL		12	0	142.3	7.4	34.5	1.13	7.5	0.1875		0.025	2021.1.20	2			2018.12.12	5	135.9
2021-10-12 19:46:23	孙梓涵	男	9岁11月0天	9.92	先天性肾上腺皮质增生症、CPP	0.035	<0.05	<0.02	0.065	0.403	0.512	7.429	0.06	0.929	2.15	1.465	0.195	0.587	0.148	0.054	0.201	<0.005	0.005	<0.004	<0.005	0.4	0.537	<0.05	2	I2G(Het)，	I173N(Het)。		14	0.33	156.3	3.3	52		15	0.1875		0.025					2018.3	2.5
2021-05-26 19:54:37	熊宇轩	男	10岁	10	先天性肾上腺皮质增生症	3.786	2.541	0.063	0.141	0.06	2.749	101.15	0.459	4.745	2.786	1.147	0.063	2.947	1.292	0.168	1.047	0.05	5.997	0.006	0.005	5.526	3.991	0.125	1				13	1.7	148.6	10.8	41	1.27	17.5			0.025	2021.5	2.5	2021.9	3.75	2020.1		136.6
2021-09-07 19:08:58	熊宇轩	男	10岁	10	先天性肾上腺素皮质增生症	0.35	0.253	0.049	0.502	0.079	0.108	38.812	0.146	1.396	26.418	24.18	0.334	1.192	1.194	0.146	0.226	0.03	3.493	<0.005	<0.005	3.838	3.667	0.069	1				13	0.9	151	10	49.1		17.5			0.025	2021.5	2.5	2021.9	3.75	2020.1
2021-05-17 21:37:34	陈可轩	女	10岁1月0天	10.08	先天性肾上腺皮质增生症	4.332	0.322	0.059	0.328	0.138	0.649	81.248	0.548	1.223	38.641	13.693	5.93	3.01	0.797	0.107	0.675	0.011	0.717	0.006	0.012	3.431	2.661	0.147	NCAH	c.92C>T	P.P30L			0.775	144.5	4.08	37	1.19	15					2.5		3.75		7
2021-08-20 20:09:28	陈可轩	女	10岁2月0天	10.17	先天性肾上腺皮质增生症	0.187	0.114	0.023	0.393	0.375	0.129	28.343	0.303	1.865	12.665	10.327	3.945	2.443	0.448	0.135	0.258	0.018	0.539	0.027	0.011	1.24	1.881	0.057	NCAH	c.92C>T	P.P30L			0.775	145.4	4.08	36	1.17	20					2.5		3.75			137.5
2021-08-24 20:40:00	林秀豪	男	10岁2月0天	10.17	先天性肾上腺皮质增生症	0.636	0.891	0.022	0.065	0.023	0.998	21.527	0.038	2.441	42.058	17.257	0.341	1.022	2.435	0.128	0.249	0.014	1.976	0.005	<0.005	4.114	0.815	<0.05	1				13	0.85	154.6	7.2	53	1.51	20			0.05		2.5
2022-01-24 20:48:27	孙雅莉	女	10岁3月0天	10.25	先天性肾上腺皮质增生症、CPP	<0.04	<0.05	<0.02	<0.05	0.179	0.058	0.121	<0.05	<0.0125	1.595	1.422	<0.05	<0.05	<0.05	0.056	<0.05	0.066	0.106	<0.005	<0.005	0.101	<0.05	<0.05	2	P.I173N	EX3DEL		12	0	143.7	3.2	37	1.19	10	0.1875		0.025	2021.1.20	2			2018.12.12	2021.12停用
2021-08-23 18:54:15	陈子康	男	10岁5月0天	10.42	先天性肾上腺皮质增生症	0.505	1.544	0.154	0.842	0.274	0.898	73.161	0.133	22.893	3.667	2.091	0.362	2.977	0.971	0.177	0.56	0.021	0.851	0.005	0.005	1.459	2.612	0.066	1	exon1-10del	IN2		11	1.9	132.6	8.6	29	1.115	12.5	0.093		0.05							137.8
2022-01-10 20:47:30	熊宇轩	男	10岁7月0天	10.58	先天性肾上腺皮质增生症	0.294	1.18	<0.05	<0.05	0.103	1.127	26.766	0.058	5.731	5.467	4.186	0.344	1.779	0.119	0.051	0.22	<0.005	0.106	<0.005	<0.005	1.667	3.126	<0.05	1				13.5	0.9	153.5	6.1	46		17.5			0.025	2021.5	2.5	2021.9	3.75	2020.1
2022-02-11 18:31:25	杜晓磊	男	10岁8月0天	10.67	先天性肾上腺皮质增生症	0.319	<0.05	<0.05	<0.05	<0.05	<0.05	0.127	<0.05	<0.0125	13.375	7.955	<0.05	<0.05	<0.05	0.052	<0.05	<0.005	0.132	<0.005	<0.005	0.442	0.085	<0.05	2				14	0.5	54	3.4	41	1.27	10	0.125									137.4
2021/4/2	胡淳熙	男	11岁2月0天	11.17	先天性肾上腺皮质增生症	0.396	0.063	0.028	0.079	0.004	0.127	13.509	0.01	0.307	0.184	0.125	0.395	0.487	4.666	0.555	0.422	0.011	0.182	0.005	0.006	0.901	1.222	0.106	1	P.I173N（het）	EXon3del(het)。			0.72	166.8	6.24	56.5	1.58	20			0.125
2022-02-11 18:37:46	胡淳熙	男	12岁	12	先天性肾上腺皮质增生症	2.829	0.247	0.096	0.167	<0.05	0.36	26.762	0.101	0.882	65.624	18.209	0.581	1.604	1.814	0.146	0.223	0.043	0.516	<0.005	<0.005	2.28	1.449	<0.05	1	P.I173N（het）	EXon3del(het)。		15	0.72	172	6.24	58	1.61	20			0.125
2021-10-08 19:03:01	黄昱	女	12岁8月0天	12.67	先天性肾上腺皮质增生症	0.427	<0.05	0.04	<0.05	0.226	<0.05	0.687	<0.05	0.058	52.153	15.447	<0.05	0.654	0.38	0.065	0.218	<0.005	0.711	<0.005	<0.005	1.807	0.841	<0.05	2				15	1	157.1	2.1	77.5	2	17.5	0.1875		0.025
2021-09-03 20:09:13	杜奥攀	男	12岁9月0天	12.75	先天性肾上腺皮质增生症	0.24	1.521	0.085	1.124	0.262	1.441	48.909	0.069	9.122	0.359	1.004	0.572	0.666	3.21	0.147	0.257	0.027	3.845	0.011	0.017	0.679	0.578	0.067	1					1		2.7	74	1.93	20			0.025
2022-01-29 20:07:05	黄昱	女	13岁	13	先天性肾上腺皮质增生症	4.003	2.048	<0.02	0.447	0.091	2.083	69.916	1.182	8.007	26.76	15.224	0.987	8.883	1.32	0.112	1.312	0.061	1.318	<0.005	<0.005	5.684	10.112	0.069	2					1	157.3	1.6	75	1.95	17.5	0.1875		0.025
2022-01-24 20:47:04	杜奥攀	男	13岁5月0天	13.42	先天性肾上腺皮质增生症、CPP	5.426	1.666	0.223	0.493	0.075	2.009	92.346	0.223	2.43	2.211	2.411	0.62	3.75	2.56	0.093	0.482	0.118	0.472	<0.005	<0.005	1.919	4.271	<0.05	1					1	157.2	2.7	74	1.93	20
2022-01-28 21:05:21	张晓娅	女	14岁9月0天	14.75	先天性肾上腺皮质增生症	0.312	0.441	<0.02	<0.05	0.12	0.434	9.876	<0.05	0.455	1.913	1.582	0.258	1.338	0.154	0.082	0.206	0.056	0.056	0.14	<0.005	0.274	0.321	<0.05					15	1	150.6		41	1.27	12	0.1875		0.025
2021-07-05 20:37:25	徐兆君	女	16岁2月0天	16.17	先天性肾上腺皮质增生症	0.323	0.236	0.02	0.026	0.02	0.282	0.466	0.026	0.374	0.401	0.215	0.059	0.428	0.019	0.05	0.2	0.102	0.019	0.088	0.013	0.024	0.028	0.05	1	I2G	EX3DEL		18	0	144.2	0.2	58	1.61	15	0.1875		0.05							145.3
2021-07-13 20:11:25	吴灿	男	16岁8月0天	16.67	先天性肾上腺皮质症	7.247	13.171	0.099	2.303	0.114	11.489	179.181	0.554	19.144	13.302	3.14	1.285	3.626	3.017	0.273	0.355	0.096	1.495	0.009	0.024	0.521	0.662	0.089	2	Exon1、3、4、6、7Del（Het）	I2G(c.518T>A)（Het）		18	0.2	159.7	0.8	55	1.55	15	0.1875									138.1
2021-11-29 19:56:14	田芯钰	女	17岁	17	先天性肾上腺皮质增生症	2.047	0.086	<0.02	0.156	0.266	0.197	0.741	<0.05	2.591	64.975	34.379	0.151	0.945	<0.05	0.063	0.201	0.022	3.309	<0.005	<0.005	1.973	0.419	<0.05	1				18	0	149.6	2.2	71	1.87	20	0.1875		0	0	0	0	0	0	0
2022-01-29 20:07:45	吴灿	男	17岁3月0天	17.25	先天性肾上腺皮质增生症	4.385	3.715	<0.02	0.383	0.111	3.669	110.322	0.541	16.066	13.019	6.559	1.198	3.222	1.721	0.176	0.399	0.032	0.956	<0.005	<0.005	1.125	1.99	<0.05	2	Exon1、3、4、6、7Del（Het）	I2G(c.518T>A)（Het）		18	0.2	160.3	1.2	60	1.65	15	0.1875
2021-09-09 20:24:10	田芯钰	女	17岁6月0天	17.5	先天性肾上腺皮质增生症	2.501	0.56	0.009	0.436	0.115	0.465	37.406	0.062	5.52	228.235	52.037	1.628	3.753	1.35	0.111	1.051	0.289	0.739	0.114	0.011	15.207	2.539	0.097	1				18	0	149	2.4	72	1.89	20	0.375
[truncated: 46 more columns]
